# Supplementary material
Source: MDPI journal article supplement (https://www.mdpi.com/2073-4344/13/3/593)
Supplement: s1 [file s1 › catalysts-2254439-supplementary.pdf]

# Photocatalytic Evaluation of the Ternary Composite $\text{CdSO}_4\text{-ZnAl LDH/ZnS}$ in Hydrogen Production without a Sacrificial Reagent

## Supplementary Information

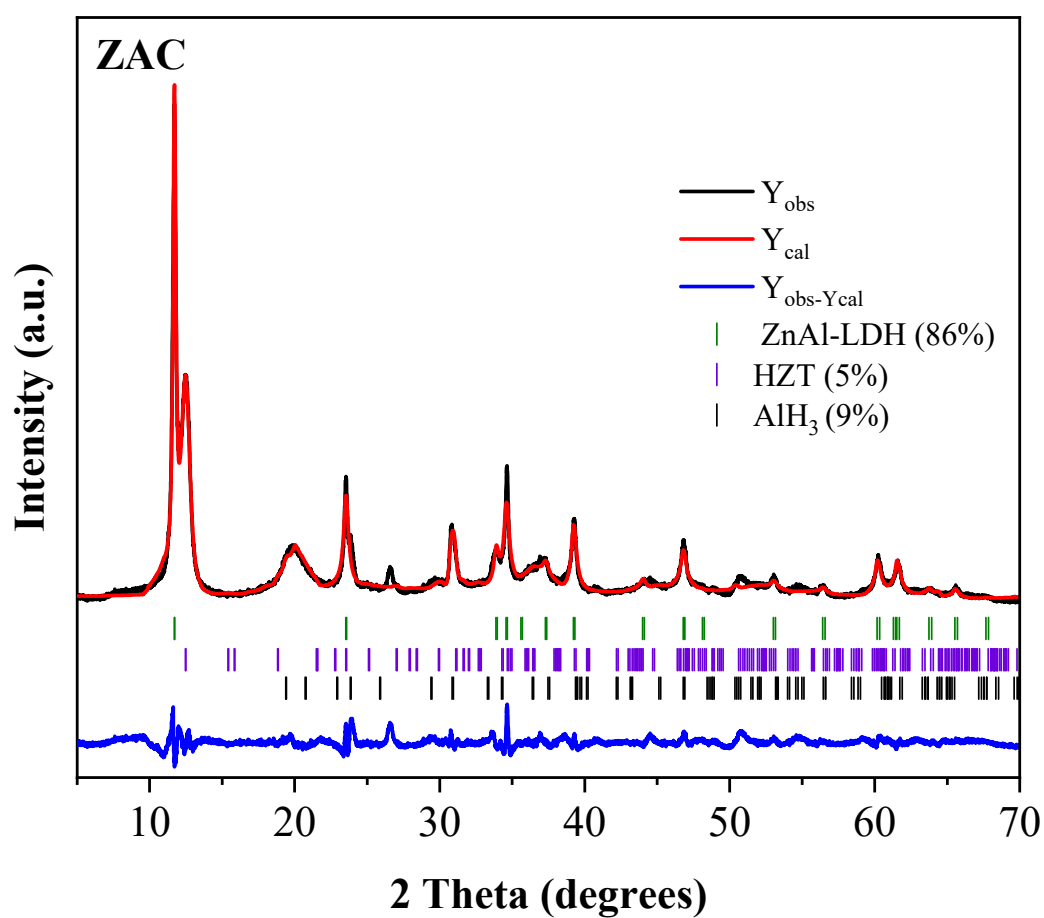

Figure S1. Rietveld Analysis for the sample ZAC. The reliability factors obtained from the Rietveld refinement are the  $R_{\text{wp}}(\%) = 18.4$ ,  $R_{\text{exp}}(\%) = 6.63$ ,  $4.0$  and  $\chi^2 = 7.7$ .
